# Supplementary material for: First mixed hydrazide/hydroxylamide metal aggregates
Source: Royal Society of Chemistry journal article supplement (doi:10.1039/b608135e), 2006-01-01
Supplement: b608135e.pdf [file b608135e.pdf]

### **Experimental procedure**

*Synthesis of [Zn{MeZn}<sub>4</sub>{HN-NMe<sub>2</sub>}<sub>2</sub>{O-NEt<sub>2</sub>}<sub>4</sub>] (1):* Me<sub>2</sub>Zn (5.00 mL of a 2.0 M solution in toluene; 10.0 mmol) was added dropwise via syringe to a stirred solution of H<sub>2</sub>NNMe<sub>2</sub> (0.40 mL, 5.22 mmol) and Et<sub>2</sub>NOH (0.50 mL, 4.87 mmol) in *n*-hexane (20 mL) at 0 °C. The reaction mixture was gradually warmed to room temperature and stirred for 6 h. The solvents were removed under reduced pressure, the resulting residue was dissolved in *n*-hexane and filtered. The clear, colourless filtrate was stored at -10 °C to afford colourless, platelike crystals.

Mp 164 °C (decomp); <sup>1</sup>H NMR (400 MHz, C<sub>7</sub>D<sub>8</sub>, 200 K): δ = -0.40 [s, 6 H, ZnCH<sub>3</sub>], -0.27 [s, 6 H, ZnCH<sub>3</sub>], 0.98 [t, <sup>3</sup>J<sub>H,H</sub> = 6.9 Hz, 6 H, N(CH<sub>2</sub>CH<sub>3</sub>)<sub>2</sub>], 1.16 [t, <sup>3</sup>J<sub>H,H</sub> = 6.7 Hz, 6 H, N(CH<sub>2</sub>CH<sub>3</sub>)<sub>2</sub>], 1.18 [t, <sup>3</sup>J<sub>H,H</sub> = 6.7 Hz, 6 H, N(CH<sub>2</sub>CH<sub>3</sub>)<sub>2</sub>], 1.34 [t, <sup>3</sup>J<sub>H,H</sub> = 6.7 Hz, 6 H, N(CH<sub>2</sub>CH<sub>3</sub>)<sub>2</sub>], 1.61, 1.64 [s, 2 H, N-H], 1.81 [s, 6 H, N(CH<sub>3</sub>)<sub>2</sub>], 2.17 [s, 6 H, N(CH<sub>3</sub>)<sub>2</sub>], 2.29 [q, <sup>3</sup>J<sub>H,H</sub> = 6.7 Hz, 2 H, N(CH<sub>2</sub>CH<sub>3</sub>)<sub>2</sub>], 2.65 [q, <sup>3</sup>J<sub>H,H</sub> = 6.7 Hz, 2 H, N(CH<sub>2</sub>CH<sub>3</sub>)<sub>2</sub>], 2.74 [q, <sup>3</sup>J<sub>H,H</sub> = 6.9 Hz, 2 H, N(CH<sub>2</sub>CH<sub>3</sub>)<sub>2</sub>], 2.83 [q, <sup>3</sup>J<sub>H,H</sub> = 6.9 Hz, 2 H, N(CH<sub>2</sub>CH<sub>3</sub>)<sub>2</sub>], 2.90 [q, <sup>3</sup>J<sub>H,H</sub> = 6.9 Hz, 2 H, N(CH<sub>2</sub>CH<sub>3</sub>)<sub>2</sub>], 3.00 [q, <sup>3</sup>J<sub>H,H</sub> = 6.8 Hz, 2 H, N(CH<sub>2</sub>CH<sub>3</sub>)<sub>2</sub>], 3.16 [q, <sup>3</sup>J<sub>H,H</sub> = 7.2 Hz, 2 H, N(CH<sub>2</sub>CH<sub>3</sub>)<sub>2</sub>], 3.86 [q, <sup>3</sup>J<sub>H,H</sub> = 7.5 Hz, 2 H, N(CH<sub>2</sub>CH<sub>3</sub>)<sub>2</sub>] ppm; <sup>1</sup>H NMR (400 MHz, C<sub>7</sub>D<sub>8</sub>, 250 K): δ = -0.51 [s, 6 H, ZnCH<sub>3</sub>], -0.40 [s, 6 H, ZnCH<sub>3</sub>], 0.96 [t, <sup>3</sup>J<sub>H,H</sub> = 6.9 Hz, 6 H, N(CH<sub>2</sub>CH<sub>3</sub>)<sub>2</sub>], 1.11 [m, 12 H, N(CH<sub>2</sub>CH<sub>3</sub>)<sub>2</sub>], 1.29 [t, <sup>3</sup>J<sub>H,H</sub> = 7.3 Hz, 6 H, N(CH<sub>2</sub>CH<sub>3</sub>)<sub>2</sub>], 1.45 [s, 2 H, N-H], 1.94 [s, 6 H, N(CH<sub>3</sub>)<sub>2</sub>], 2.23 [s, 6 H, N(CH<sub>3</sub>)<sub>2</sub>], 2.32-2.49 [m, 4 H, N(CH<sub>2</sub>CH<sub>3</sub>)<sub>2</sub>], 2.67 [q, <sup>3</sup>J<sub>H,H</sub> = 7.0 Hz, 2 H, N(CH<sub>2</sub>CH<sub>3</sub>)<sub>2</sub>], 2.74-2.91 [m, 6 H, N(CH<sub>2</sub>CH<sub>3</sub>)<sub>2</sub>], 3.01 [q, <sup>3</sup>J<sub>H,H</sub> = 7.0 Hz, 2 H, N(CH<sub>2</sub>CH<sub>3</sub>)<sub>2</sub>], 3.81 [q, <sup>3</sup>J<sub>H,H</sub> = 7.6 Hz, 2 H, N(CH<sub>2</sub>CH<sub>3</sub>)<sub>2</sub>] ppm; <sup>1</sup>H NMR (400 MHz, C<sub>7</sub>D<sub>8</sub>, 300 K): δ = -0.60 [s, 6 H, ZnCH<sub>3</sub>], -0.50 [s, 6 H, ZnCH<sub>3</sub>], 0.95 [t, <sup>3</sup>J<sub>H,H</sub> = 7.0 Hz, 6 H, N(CH<sub>2</sub>CH<sub>3</sub>)<sub>2</sub>], 1.07 [t, <sup>3</sup>J<sub>H,H</sub> = 7.1 Hz, 12 H, N(CH<sub>2</sub>CH<sub>3</sub>)<sub>2</sub>], 1.26 [t, <sup>3</sup>J<sub>H,H</sub> = 7.3 Hz, 6 H, N(CH<sub>2</sub>CH<sub>3</sub>)<sub>2</sub>], 1.54 [s, 2 H, N-H], 2.04 [s, 6 H, N(CH<sub>3</sub>)<sub>2</sub>], 2.28 [s, 6 H, N(CH<sub>3</sub>)<sub>2</sub>], 2.36 [q, <sup>3</sup>J<sub>H,H</sub> = 6.8 Hz, 2 H, N(CH<sub>2</sub>CH<sub>3</sub>)<sub>2</sub>], 2.65-2.91 [m, 10 H, N(CH<sub>2</sub>CH<sub>3</sub>)<sub>2</sub>], 3.01 [q, <sup>3</sup>J<sub>H,H</sub> = 7.1 Hz, 2 H, N(CH<sub>2</sub>CH<sub>3</sub>)<sub>2</sub>], 3.77 [q, <sup>3</sup>J<sub>H,H</sub> = 7.6 Hz, 2 H, N(CH<sub>2</sub>CH<sub>3</sub>)<sub>2</sub>] ppm; <sup>13</sup>C {<sup>1</sup>H} NMR (100.6 MHz, C<sub>7</sub>D<sub>8</sub>, 200 K): δ = -10.59, -9.32 [ZnCH<sub>3</sub>], 12.74, 13.75, 14.05, 14.4 [N(CH<sub>2</sub>CH<sub>3</sub>)<sub>2</sub>], 52.14, 53.50

# Supplementary Material (ESI) for Chemical Communications  
# This journal is (c) The Royal Society of Chemistry 2006

[N(CH<sub>3</sub>)<sub>2</sub>], 55.04, 55.22, 56.67, 62.24 [N(CH<sub>2</sub>CH<sub>3</sub>)<sub>2</sub> ppm; <sup>13</sup>C {<sup>1</sup>H} NMR (100.6 MHz, C<sub>7</sub>D<sub>8</sub>, 300 K): δ = -10.77, -10.27[ZnCH<sub>3</sub>], 12.23, 13.02, 13.72 [N(CH<sub>2</sub>CH<sub>3</sub>)<sub>2</sub>], 52.61, 53.44 [N(CH<sub>3</sub>)<sub>2</sub>], 55.49, 55.90, 61.57 [N(CH<sub>2</sub>CH<sub>3</sub>)<sub>2</sub> ppm; elemental analysis for C<sub>24</sub>H<sub>66</sub>N<sub>8</sub>O<sub>4</sub>Zn<sub>5</sub> (857.78): calcd: C 33.60, H 7.76, N 13.06; found: C 33.43, H 7.73, N 12.91; EI-MS [*m/z* (%): 843 (12), [M<sup>+</sup> - CH<sub>3</sub>], 674 (100), [M<sup>+</sup> - ZnONEt<sub>2</sub> - 2 CH<sub>3</sub>]; IR [KBr, cm<sup>-1</sup>]: 3184 (br, N-H).

*Synthesis of [Zn{EtZn}<sub>4</sub>{HN-N(CH<sub>2</sub>)<sub>5</sub>}<sub>2</sub>{O-NEt<sub>2</sub>}<sub>4</sub>] (2):* The experimental procedure was the same as for compound **1**, but Et<sub>2</sub>Zn (5.0 mL of a 2.0 M solution in *n*-hexane; 10.0 mmol) was used instead of Me<sub>2</sub>Zn and 1-aminopiperidine (0.54 mL, 5.00 mmol) was used instead of *N,N*-dimethylhydrazine. An *n*-hexane solution of compound **2** was stored at -10 °C for several days to afford colourless platelike crystals.

Mp 195 °C (decomp); <sup>1</sup>H NMR (200.1 MHz, C<sub>6</sub>D<sub>6</sub>, 300K): δ = 0.32-0.54 [m, 8 H, ZnCH<sub>2</sub>CH<sub>3</sub>], 1.02-3.70 [m, 74 H, ZnCH<sub>2</sub>CH<sub>3</sub>, N(CH<sub>2</sub>CH<sub>3</sub>)<sub>2</sub>, N(CH<sub>2</sub>)<sub>5</sub>, NH, N(CH<sub>2</sub>CH<sub>3</sub>)<sub>2</sub>] ppm; <sup>13</sup>C {<sup>1</sup>H} NMR (50.3 MHz, C<sub>6</sub>D<sub>6</sub>, 300K): δ = 2.54, 3.20, 3.73 [ZnCH<sub>2</sub>CH<sub>3</sub>], 11.88, 12.31, 12.83, 13.12 [ZnCH<sub>2</sub>CH<sub>3</sub>], 13.79, 13.89, 14.09, 14.43, 14.70, 15.28 [N(CH<sub>2</sub>CH<sub>3</sub>)<sub>2</sub>], 22.83, 22.95, 23.12, 23.38, 23.97, 24.16, 24.34, 24.97, 26.44, 26.75, 61.15 [N(CH<sub>2</sub>)<sub>5</sub>], 53.42, 55.79, 55.89 [N(CH<sub>3</sub>)<sub>2</sub>], 63.25, 63.89, 64.64, 65.31, 65.66 [N(CH<sub>2</sub>CH<sub>3</sub>)<sub>2</sub>] ppm; elemental analysis for C<sub>34</sub>H<sub>82</sub>N<sub>8</sub>O<sub>4</sub>Zn<sub>5</sub>: calcd: C 41.08, H 8.31, N 11.27; found: C 40.79, H 8.04, N 11.60; IR [KBr, cm<sup>-1</sup>]: 3177 (br, N-H).

### **Computational Details**

All calculations were carried out using the Turbomole (Version 5.7) [1] program package. The four isomeric species **3**, **4a**, **4b** and **4c** were optimized at the DFT level of theory, employing Turbomoles RIDFT [2-4] program deck, which is making use of the "RI two-electron-integral" routine [5] for the approximate evaluation of two-electron integrals. All-electron SV(P) basis sets [6] for all elements including Zn were employed, since relativistic effects are expected to be small. The calculations were done with a standard grid of m3 size [7].

Both the comparison of the solid state structure of **1** and extensive test calculations up to the RI-CC2(fc)/TZVPP level of theory on the ZnONH<sub>2</sub><sup>+</sup> cation suggest that, DFT/SV(P) with the Becke-Perdew local density functional [8] is both sufficient and efficient in the reproduction of structural features of the considered compounds.

As a starting point for the calculations on the twofold dimethylhydrazine substituted species **4a**, **4b** and **4c** one molecular subunit from the solid state structure of **1** was chosen, and two Me<sub>2</sub>NO groups were replaced by two Me<sub>2</sub>NNH groups. For the generation of the different steric orientations of the hydrazine group substituents **4a**, **4b** and **4c**, the N-N bonds were rotated from one starting geometry by 180°. All starting geometries lead to converging optimisations.

#### References

- [1] R. Ahlrichs, M. Bär, M. Häser, H. Horn, C. Kölmel, Chem. Phys. Letters (1989) 162, 165.
- [2] O. Treutler, R. Ahlrichs, J. Chem. Phys. (1995) 102, 346.
- [3] K. Eichkorn, O. Treutler, H. Öhm, M. Häser, R. Ahlrichs, Chem. Phys. Letters. (1995) 242, 652.
- [4] K. Eichkorn, F. Weigend, O. Treutler, R. Ahlrichs, Theor. Chem. Acc. (1997) 97, 119.
- [5] R. Ahlrichs, Phys. Chem. Chem. Phys. (2004) 6, 5119.
- [6] A. Schäfer, H. Horn, R. Ahlrichs, J. Chem. Phys. (1992) 97, 2571.
- [7] K. Eichkorn, F. Weigend, O. Treutler, R. Ahlrichs, Theor. Chem. Acc. (1997) 97, 119.
- [8] a) P. A. M. Dirac, Proc. Royal Soc. (London)(1929) A 123, 714.  
b) J. C. Slater, Phys. Rev. (1951) 81, 385.  
c) S. H. Vosko, L. Wilk, M. Nusair, Can. J. Phys. (1980) 58, 1200.  
d) A. D. Becke Phys. Rev. (1988) A 38, 3098.  
e) J. P. Perdew, Phys. Rev. (1986) B 33, 8822.

# Supplementary Material (ESI) for Chemical Communications  
# This journal is (c) The Royal Society of Chemistry 2006

Coordinates in Bohr Units

Compound 3

|                   |                   |                   |    |
|-------------------|-------------------|-------------------|----|
| 0.00071527859868  | 0.00329145075180  | -1.99708219804109 | zn |
| -3.08428637670607 | -5.00721666698577 | 0.38298575014271  | zn |
| -3.45062199749069 | 4.62101670971681  | -0.34803590493626 | zn |
| 3.08699058437470  | 5.00546861033120  | 0.37436348915589  | zn |
| 3.45451577750036  | -4.61756882968785 | -0.36421563232857 | zn |
| -6.20141374331880 | -7.07713946730516 | 0.73597119175645  | c  |
| -5.78491750665178 | -9.14048797601802 | 0.66822377020163  | h  |
| -7.58457058182809 | -6.67060655749414 | -0.80143843063379 | h  |
| -7.19056129125722 | -6.71865733266240 | 2.56012474866606  | h  |
| -6.40248549855414 | 6.93709075063919  | -0.69666000987749 | c  |
| -7.53156753986595 | 7.02188435874958  | 1.08012926923309  | h  |
| -7.71260539913870 | 6.33725450301424  | -2.23452741396675 | h  |
| -5.83001689446562 | 8.91605774753862  | -1.13684737121826 | h  |
| 6.19852575021090  | 7.08413655234158  | 0.72562236502905  | c  |
| 7.16810109195771  | 6.75819334280006  | 2.56632378731142  | h  |
| 5.78271899996166  | 9.14597977688976  | 0.61708482657179  | h  |
| 7.59762609559966  | 6.65054490558785  | -0.78971456274229 | h  |
| 6.40466107696333  | -6.93423122187506 | -0.72404278020201 | c  |
| 7.43412353719899  | -7.16099100650041 | 1.10015701170998  | h  |
| 7.80161890401545  | -6.23824238543178 | -2.14015723218259 | h  |
| 5.84161091869226  | -8.86839941955250 | -1.34083935757732 | h  |
| 0.94143917789833  | -3.46424272163887 | -3.26183611309229 | n  |
| 1.85524662230277  | -3.49759437340170 | -5.00469558603800 | h  |
| -1.22532696276070 | -5.13597961099919 | -3.43486364149981 | n  |
| -0.42761030060744 | -7.74939955277289 | -3.95494345584944 | c  |
| 0.55417721142971  | -7.89486260186371 | -5.82532619782110 | h  |
| -2.10884963883323 | -9.00676172429217 | -3.96369524611206 | h  |
| 0.89131774161463  | -8.37750512123169 | -2.45368700172678 | h  |
| -3.02727472921892 | -4.26015076255634 | -5.36107239831751 | c  |
| -3.68346213054143 | -2.33909432366556 | -4.84041380219082 | h  |
| -4.68829864049400 | -5.54356999644635 | -5.40755995713726 | h  |
| -2.13825320845035 | -4.21485132256616 | -7.28298446240723 | h  |
| -3.09541479716106 | -1.13377611750694 | -0.20656646646227 | o  |
| -4.68056003229304 | 0.77893607662609  | 0.84897295230253  | n  |
| -7.27096399218837 | 0.32821893374706  | -0.04793897961938 | c  |
| -7.30534190030493 | 0.48432371132728  | -2.13831315477877 | h  |
| -8.53713119305635 | 1.79702097749261  | 0.75337335705676  | h  |
| -7.93660020994013 | -1.59226417463360 | 0.51672580583286  | h  |
| -4.52226518849602 | 0.61498426787084  | 3.61561555486100  | c  |
| -5.67105307123793 | 2.15499808638210  | 4.46225023207429  | h  |
| -5.20922701420424 | -1.26102872336671 | 4.29925339777729  | h  |
| -2.52376862382989 | 0.89225026874049  | 4.16688051304601  | h  |
| -0.40553323592633 | 5.07793781730692  | 1.92334157520989  | o  |
| -1.01296975187421 | 6.41533848285519  | 4.21464289416143  | n  |
| -0.75151543229408 | 9.11352336168549  | 3.75502822343002  | c  |
| -1.22775149563633 | 10.15820115401164 | 5.51676114955823  | h  |
| 1.21039271584949  | 9.65508334640490  | 3.14409869092500  | h  |
| -2.11471082806534 | 9.69342602832410  | 2.26737993608450  | h  |
| 0.67835807591352  | 5.53490431534712  | 6.18569843146155  | c  |
| 0.39598089170031  | 3.47744335673258  | 6.48820893294154  | h  |
| 0.22622873410172  | 6.53773664142582  | 7.97713829819803  | h  |
| 2.72808683162275  | 5.87000655785604  | 5.71946614878267  | h  |
| 3.12675030888776  | 1.13642364427172  | -0.25379653653584 | o  |
| 4.67009098325179  | -0.77939540840068 | 0.85871390780493  | n  |
| 4.42994985110969  | -0.60544024911643 | 3.61892052871818  | c  |
| 5.53713851100326  | -2.15415329987679 | 4.50412514557091  | h  |
| 2.41336167296568  | -0.86352715337820 | 4.10972206289677  | h  |
| 5.11305071082006  | 1.26639443475934  | 4.31761021197137  | h  |
| 7.28761820804870  | -0.34034696761707 | 0.03805873558857  | c  |
| 7.38341366183427  | -0.50175915025297 | -2.04981114165806 | h  |

# Supplementary Material (ESI) for Chemical Communications  
# This journal is (c) The Royal Society of Chemistry 2006

|                   |                    |                   |   |
|-------------------|--------------------|-------------------|---|
| 8.52359364878628  | -1.81116508408963  | 0.88132547476212  | h |
| 7.94206979393490  | 1.57936536014664   | 0.61806039260751  | h |
| 0.41484031291166  | -5.09732668650748  | 1.91089256684763  | o |
| 1.02865045392286  | -6.41866183325913  | 4.20912119252171  | n |
| 0.80860023395702  | -9.12144082991025  | 3.75413058828636  | c |
| 1.29083868176812  | -10.15547325524724 | 5.52055050820098  | h |
| 2.18712789679192  | -9.68444190576431  | 2.27416483546711  | h |
| -1.14241983695562 | -9.69228004716147  | 3.13445047758474  | h |
| -0.68606295809328 | -5.55806946353365  | 6.16882996628543  | c |
| -0.43601270614758 | -3.49577781129280  | 6.46690398231550  | h |
| -0.22858729208782 | -6.54884518689360  | 7.96563607184089  | h |
| -2.72805346205155 | -5.92525996192421  | 5.69286715500837  | h |
| -0.95021674139828 | 3.46833711673006   | -3.25796528039936 | n |
| -1.87024782119157 | 3.50303152585965   | -4.99752911148537 | h |
| 1.21468759317869  | 5.14219403917231   | -3.43702198626128 | n |
| 3.01258332795775  | 4.26947923984068   | -5.36919314260600 | c |
| 3.67584597874354  | 2.35077927621354   | -4.84907077327171 | h |
| 4.67006258873848  | 5.55725013803033   | -5.42116280104173 | h |
| 2.11704282406828  | 4.22233185517885   | -7.28802461290408 | h |
| 0.41149943681942  | 7.75434045691955   | -3.95466521254009 | c |
| 2.09033837986920  | 9.01486511352060   | -3.96610484870106 | h |
| -0.90646666478318 | 8.37976283571445   | -2.45131363376842 | h |
| -0.57394142790953 | 7.89844942254091   | -5.82323478672521 | h |

# Supplementary Material (ESI) for Chemical Communications  
# This journal is (c) The Royal Society of Chemistry 2006

Compound 4a

|                   |                   |                   |    |
|-------------------|-------------------|-------------------|----|
| 6.17589894596235  | 7.12117539714370  | -0.92741697041344 | c  |
| 3.34600082672494  | 4.77624571589879  | -0.11277477207732 | zn |
| 4.90920216180007  | 0.92363039829060  | 0.59622923637290  | n  |
| 3.01418858741512  | -0.98435247042298 | 0.26072627579638  | o  |
| 3.13557694645426  | -5.01089854778502 | 0.34689177343796  | zn |
| 6.34494508411011  | -6.96542069196576 | 0.24348037880003  | c  |
| 0.00002112066746  | -0.00001589486029 | -1.70574542641142 | zn |
| -3.34595377388397 | -4.77617092974332 | -0.11307894983240 | zn |
| -4.90931538077243 | -0.92362661679551 | 0.59591337600185  | n  |
| -5.79511398765820 | -0.75703094615567 | 3.22377503393204  | c  |
| 1.03453270057370  | 3.30628611803166  | -3.14794219423636 | o  |
| -1.17285062615132 | 4.91094094680953  | -3.42451110801964 | n  |
| -0.27459917064850 | 7.45133110291513  | -4.09545940854966 | c  |
| -3.13559704812471 | 5.01091660216050  | 0.34685157192325  | zn |
| -6.34487186216104 | 6.96560808720785  | 0.24341624628200  | c  |
| -3.01423541521886 | 0.98436128194109  | 0.26059060484945  | o  |
| -1.03432367327500 | -3.30620554780426 | -3.14820805166548 | o  |
| 1.17307526465067  | -4.91083308710948 | -3.42457524317363 | n  |
| 0.27467257839703  | -7.45119055070891 | -4.09552698544210 | c  |
| -2.70620725364676 | 3.86499241357962  | -5.48289220627077 | c  |
| 0.26395156054250  | 4.78088819413766  | 2.24821518058279  | n  |
| 0.67940218145480  | 6.26948607042881  | 4.53739445445947  | n  |
| -1.36427765530675 | 5.85685793266391  | 6.33017597746569  | c  |
| 0.89351254003693  | 8.91758996095195  | 3.85274053942345  | c  |
| 6.98115649589979  | 0.44995421767055  | -1.19468132282863 | c  |
| 5.79538184282818  | 0.75643068151188  | 3.22391293845074  | c  |
| 2.70669480050046  | -3.86458328197257 | -5.48264103943309 | c  |
| -0.26410505235142 | -4.78111317169786 | 2.24808497881317  | n  |
| -0.67975925287689 | -6.26963751479956 | 4.53729575659495  | n  |
| 1.36385548846319  | -5.85715272389748 | 6.33018391770745  | c  |
| -6.17551828036518 | -7.12147778114768 | -0.92772095368325 | c  |
| -0.89408366285950 | -8.91774865230972 | 3.85270136957104  | c  |
| -6.98146029300700 | -0.44951981885260 | -1.19463615863976 | c  |
| 7.68606322970026  | 7.07344955733436  | 0.54251216655789  | h  |
| 5.57020899249993  | 9.13131768788267  | -1.09340791464207 | h  |
| 7.07628268329947  | 6.60985469993512  | -2.76232784200655 | h  |
| -7.55748232069783 | 6.58520091336476  | 1.92232997674233  | h  |
| -7.50403480553078 | 6.53636727284340  | -1.46385176607566 | h  |
| -5.97119283933286 | 9.03867600827618  | 0.22838241695495  | h  |
| -1.61542392627518 | 3.79948226555959  | -7.28818898467619 | h  |
| -4.42326156534496 | 5.04898946070914  | -5.72198976633543 | h  |
| -3.30837823666422 | 1.92148027909836  | -4.97583032367810 | h  |
| 0.88894837419713  | 7.40279488268423  | -5.85476355202415 | h  |
| 0.89953187271000  | 8.21238302658166  | -2.53378514439302 | h  |
| -1.93934115854402 | 8.70151602636431  | -4.36281379324422 | h  |
| 2.53101789730248  | 9.18062982682579  | 2.56414411899288  | h  |
| 1.22394192023162  | 10.05786430990861 | 5.58486947581306  | h  |
| -0.85467925973874 | 9.65736133521142  | 2.88234115668022  | h  |
| -1.42400017548254 | 3.82964010674212  | 6.89053974026341  | h  |
| -3.27193877031245 | 6.37733656249318  | 5.53892742570426  | h  |
| -1.01706820530255 | 6.99320965297519  | 8.06409631698306  | h  |
| 7.76484564953062  | -1.49246247320125 | -0.94247114990847 | h  |
| 8.48584127993353  | 1.87988146750002  | -0.88812167500191 | h  |
| 6.25822188635876  | 0.67000272207423  | -3.14997405088873 | h  |
| 6.58727887088681  | -1.15650195147322 | 3.63365784272338  | h  |
| 4.18793312939844  | 1.13612057946112  | 4.51342515367966  | h  |
| 7.26601263677612  | 2.22073683002106  | 3.54018366782794  | h  |
| -7.68617272758350 | -7.07319906978495 | 0.54168581177617  | h  |
| -5.56972972969296 | -9.13166905442700 | -1.09275631310750 | h  |
| -7.07529266260039 | -6.61086927342505 | -2.76312987591034 | h  |
| 7.557470271109386 | -6.58504989641780 | 1.92246139173699  | h  |
| 7.50415090035002  | -6.53602690184682 | -1.46371833727777 | h  |

# Supplementary Material (ESI) for Chemical Communications  
# This journal is (c) The Royal Society of Chemistry 2006

|                   |                    |                   |   |
|-------------------|--------------------|-------------------|---|
| 5.97132426360984  | -9.03849765113061  | 0.22830701904582  | h |
| 1.61612865547954  | -3.79873286451074  | -7.28805099787228 | h |
| 4.42384665273634  | -5.04841867120180  | -5.72167492282937 | h |
| 3.30872134245015  | -1.92109799656999  | -4.97518019056511 | h |
| -0.88866215047337 | -7.40262718299781  | -5.85496775558838 | h |
| -0.89968568145439 | -8.21210702669237  | -2.53394585502554 | h |
| 1.93933944514906  | -8.70151585161694  | -4.36265798781493 | h |
| -2.53153288247006 | -9.18062003241779  | 2.56399654006976  | h |
| -1.22472049254892 | -10.05791440245524 | 5.58486156633911  | h |
| 0.85408878263940  | -9.65771634942571  | 2.88241655878267  | h |
| 1.42372517916760  | -3.82993214656783  | 6.89051913491233  | h |
| 3.27151431552602  | -6.37781181913204  | 5.53905501112517  | h |
| 1.01645547501300  | -6.99345418817882  | 8.06409898483438  | h |
| -7.76546428264796 | 1.49273401806375   | -0.94212099833922 | h |
| -8.48598900143326 | -1.87960814110965  | -0.88806551942622 | h |
| -6.25853159409892 | -0.66889656110699  | -3.14999757430708 | h |
| -6.58679950390600 | 1.15585737693758   | 3.63412288929100  | h |
| -4.18754299602191 | -1.13720794690108  | 4.51299076381537  | h |
| -7.26581275022737 | -2.22130691102888  | 3.53987051569646  | h |
| 0.21427623874632  | 2.92952154089838   | 2.88355617759796  | h |
| -0.21440646236778 | -2.92969321781066  | 2.88329384080694  | h |

# Supplementary Material (ESI) for Chemical Communications  
# This journal is (c) The Royal Society of Chemistry 2006

Compound **4b**

|                   |                   |                   |    |
|-------------------|-------------------|-------------------|----|
| 6.06860800339239  | 7.24968211465072  | -1.20922399072520 | c  |
| 3.25628113568806  | 4.88505032059133  | -0.32050533711186 | zn |
| 4.83028320595088  | 1.06246480288414  | 0.48027475092363  | n  |
| 3.08379055701863  | -0.90753944300672 | -0.13230341294932 | o  |
| 3.18657277231694  | -4.91326132403935 | 0.12779796419636  | zn |
| 6.39784014220770  | -6.85346647909844 | -0.10220054757486 | c  |
| -0.08839048606298 | 0.10538935963756  | -1.73093367749951 | zn |
| -3.29073099807717 | -4.73100495047300 | -0.07169284854402 | zn |
| -4.88086999985823 | -0.90388303421528 | 0.74250216026400  | n  |
| -5.72724227777506 | -0.81342578382714 | 3.38509830977289  | c  |
| 0.81539006696118  | 3.44338915513501  | -3.21527812728189 | o  |
| -1.42768615421965 | 5.01020584127553  | -3.37065414168053 | n  |
| -0.61143968911940 | 7.57655994399588  | -4.05434566392215 | c  |
| -3.22317137773018 | 4.93185487456135  | 0.45691426140827  | zn |
| -6.46288502202851 | 6.83903284938967  | 0.70026297762059  | c  |
| -2.98847466246198 | 1.01121149689761  | 0.42128542486145  | o  |
| -1.14640830030338 | -3.19821156993647 | -3.18302848656838 | o  |
| 1.07212301502730  | -4.76969245157029 | -3.56022990700359 | n  |
| 0.17889976848925  | -7.30223267067436 | -4.26489566074225 | c  |
| -3.02492668129917 | 3.96242614230141  | -5.38153795538317 | c  |
| 0.26769407897911  | 5.70561366373263  | 2.08467649481891  | n  |
| 0.68910066418682  | 4.93507378566508  | 4.67469553756056  | n  |
| -1.60249863976332 | 5.13775668949623  | 6.18799219613410  | c  |
| 2.72844321782251  | 6.40961685564674  | 5.78629530995214  | c  |
| 7.09363267698267  | 0.70588795373944  | -1.10094106452090 | c  |
| 5.43456051062480  | 0.80778080023736  | 3.18336496379722  | c  |
| 2.54095761499639  | -3.65831763565281 | -5.63237426001092 | c  |
| -0.12778539896720 | -4.69168742468721 | 2.17516853174075  | n  |
| -0.44915360366262 | -6.18507879882998 | 4.47753001588481  | n  |
| 1.64966928746798  | -5.74594684338946 | 6.19934669949866  | c  |
| -6.13102826742767 | -7.09949839175351 | -0.77701403486221 | c  |
| -0.65359310443194 | -8.83555680156116 | 3.79996890225854  | c  |
| -6.98438228767788 | -0.41066488019188 | -1.00436830339107 | c  |
| 7.65076047689092  | 7.17299110116303  | 0.18258002997866  | h  |
| 5.42905572761806  | 9.25673416423261  | -1.26493561485322 | h  |
| 6.89258086168106  | 6.82077625600777  | -3.09975489170049 | h  |
| -7.56193503231455 | 6.33395157241996  | 2.42453848563632  | h  |
| -7.72794892886810 | 6.50151712688821  | -0.95079118386395 | h  |
| -6.12271999004512 | 8.91645334074531  | 0.79251386679380  | h  |
| -2.00177054155077 | 3.94027142966139  | -7.22626565118505 | h  |
| -4.77133089473473 | 5.11681277612232  | -5.53611383200644 | h  |
| -3.56808672329753 | 2.00051101124710  | -4.88002820901640 | h  |
| 0.42836315673376  | 7.57562084144355  | -5.88976933782750 | h  |
| 0.66629910728140  | 8.33058259107447  | -2.57221846354196 | h  |
| -2.30701837627836 | 8.80711629933233  | -4.18561220050869 | h  |
| 4.47281363607170  | 6.20607854028945  | 4.63425067008852  | h  |
| 3.12586121494614  | 5.74367495668235  | 7.74000866366191  | h  |
| 2.26415934980362  | 8.49033489568371  | 5.87919796009466  | h  |
| -3.09844155121313 | 3.91924791933506  | 5.36371056174372  | h  |
| -2.34872814943184 | 7.12924569181025  | 6.29110716028940  | h  |
| -1.21656012629398 | 4.47513638976198  | 8.14625126320452  | h  |
| 7.92267524856526  | -1.20819824486290 | -0.78740766771116 | h  |
| 8.49859762389113  | 2.19144093362268  | -0.63300294278012 | h  |
| 6.55412888356484  | 0.91328136204937  | -3.11528830997374 | h  |
| 6.19801419846285  | -1.11665694215780 | 3.59317442689051  | h  |
| 3.68223762711148  | 1.15820103016900  | 4.28131398943181  | h  |
| 6.87062746686047  | 2.25031871612684  | 3.69919505872014  | h  |
| -7.54984721205472 | -7.11334628571455 | 0.78207181460343  | h  |
| -5.50460889220686 | -9.09450289161501 | -1.02738965309551 | h  |
| -7.14840939457195 | -6.56234749745303 | -2.54197385122948 | h  |
| 7.65734820057413  | -6.48768402294038 | 1.54540645478706  | h  |
| 7.50015605530732  | -6.38130425230326 | -1.83559030564546 | h  |



# Supplementary Material (ESI) for Chemical Communications  
# This journal is (c) The Royal Society of Chemistry 2006

|                   |                   |                   |   |
|-------------------|-------------------|-------------------|---|
| 6.04454192717244  | -8.92979425603021 | -0.14075881979796 | h |
| 1.39672864461247  | -3.54686712283303 | -7.40207486632682 | h |
| 4.25099615470239  | -4.83279788281575 | -5.95585343513505 | h |
| 3.15902460524006  | -1.73274026255777 | -5.07933558479709 | h |
| -1.03091819419364 | -7.22624921526801 | -5.99190129839954 | h |
| -0.94708071331526 | -8.10826504177725 | -2.69013949974514 | h |
| 1.84672268511234  | -8.53096547296823 | -4.60295810724457 | h |
| -2.33200332727213 | -9.12033257097625 | 2.56951308830512  | h |
| -0.90772621534460 | -9.98076893294450 | 5.54161463233963  | h |
| 1.06777901401919  | -9.55406595691078 | 2.76773260047975  | h |
| 1.70302464311749  | -3.71759367280460 | 6.75457796695817  | h |
| 3.53502795042148  | -6.24576358662445 | 5.34328670047323  | h |
| 1.37561636227063  | -6.88469110437220 | 7.94475140069877  | h |
| -7.77806215498591 | 1.52116046931265  | -0.70506708858520 | h |
| -8.47374885541594 | -1.85543280810190 | -0.69376705282357 | h |
| -6.29738284821001 | -0.59740202475031 | -2.97605828362859 | h |
| -6.58154517301757 | 1.06154585756394  | 3.84335873262773  | h |
| -4.08665326441468 | -1.16285945507659 | 4.63928953271269  | h |
| -7.14346541517048 | -2.33219381289596 | 3.69264470227940  | h |
| 0.18518864843703  | 7.68911303822402  | 2.10848263367880  | h |
| -0.08595765289026 | -2.83861259695340 | 2.80751248308363  | h |

# Supplementary Material (ESI) for Chemical Communications  
# This journal is (c) The Royal Society of Chemistry 2006

Compound 4c

|                   |                   |                   |    |
|-------------------|-------------------|-------------------|----|
| 6.07103073650424  | 7.15909224016117  | -1.19759153855540 | c  |
| 3.19517786214542  | 4.86955703304115  | -0.31578697661632 | zn |
| 4.75565010787458  | 1.06872573005577  | 0.74210855990512  | n  |
| 3.04570480266688  | -0.94894969553337 | 0.17012364513597  | o  |
| 3.30565767245579  | -4.86222880890349 | 0.22423886541293  | zn |
| 6.59150640781288  | -6.70186385220727 | 0.32148353938085  | c  |
| -0.00013671280638 | 0.00029227135934  | -1.66074121125789 | zn |
| -3.19527052576635 | -4.86911135465053 | -0.31622697902435 | zn |
| -4.75564741518065 | -1.06860026214123 | 0.74216933111688  | n  |
| -5.23846617812347 | -0.99570636498952 | 3.47820028809604  | c  |
| 0.90426554260735  | 3.29803829166660  | -3.24095077548549 | o  |
| -1.36957976979030 | 4.80211752726789  | -3.53143378885817 | n  |
| -0.58529465587259 | 7.34246329674206  | -4.33756202546671 | c  |
| -3.30559345176207 | 4.86268813947861  | 0.22485418227000  | zn |
| -6.59144931558030 | 6.70226266428629  | 0.32317842487569  | c  |
| -3.04586882139940 | 0.94931893413942  | 0.17041263916895  | o  |
| -0.90468294071189 | -3.29735361670084 | -3.24119104050599 | o  |
| 1.36920517955022  | -4.80135741592865 | -3.53208094039259 | n  |
| 0.58498120917391  | -7.34159970527952 | -4.33863522005619 | c  |
| -2.90537740860708 | 3.60741393118764  | -5.50935390027889 | c  |
| 0.11667561121902  | 5.80142809241452  | 1.92193666551926  | n  |
| 0.45389416537120  | 5.22774436885554  | 4.57287426914120  | n  |
| -1.88626180427843 | 5.53154424947043  | 5.99057012291264  | c  |
| 2.45104779364767  | 6.78723679024538  | 5.64290129427225  | c  |
| 7.09216593718255  | 0.65697598735628  | -0.71104908611580 | c  |
| 5.23901788210595  | 0.99501237715545  | 3.47803204586569  | c  |
| 2.90486661838991  | -3.60629659559690 | -5.50988484344493 | c  |
| -0.11654510876546 | -5.80106893266991 | 1.92120464714543  | n  |
| -0.45352318763883 | -5.22986833838136 | 4.57272284722287  | n  |
| 1.88701154838496  | -5.53487235964556 | 5.98957147304230  | c  |
| -6.07097498098308 | -7.15903166771555 | -1.19754889446077 | c  |
| -2.45023805881985 | -6.79092633806853 | 5.64131500180386  | c  |
| -7.09245493886399 | -0.65683438017999 | -0.71046438038881 | c  |
| 7.59567820869996  | 7.14253420191003  | 0.25908396549467  | h  |
| 5.45120715123957  | 9.16503575687180  | -1.37804076876223 | h  |
| 6.96517741277186  | 6.63086714615270  | -3.03019414553672 | h  |
| -7.72955242954093 | 6.20496381442292  | 2.02427276601310  | h  |
| -7.79365107466607 | 6.29433741221353  | -1.35811003244239 | h  |
| -6.30473563523728 | 8.78868729240393  | 0.38106969265702  | h  |
| -1.83960060612857 | 3.48708675423352  | -7.32598023618778 | h  |
| -4.66050890581549 | 4.72842635678208  | -5.77509505858924 | h  |
| -3.43940503822748 | 1.67616349440347  | -4.89233877092293 | h  |
| 0.49476499757575  | 7.26137931577700  | -6.14787359599186 | h  |
| 0.64566910626033  | 8.19843999210093  | -2.87095859723874 | h  |
| -2.29836266470546 | 8.53309844626278  | -4.57127569824252 | h  |
| 4.23304390963552  | 6.51354092215320  | 4.56546107047191  | h  |
| 2.78700934222053  | 6.25994435706781  | 7.64982564956194  | h  |
| 1.97804766759937  | 8.86704127798538  | 5.57450791489973  | h  |
| -3.35615107235599 | 4.25655887853883  | 5.20569010887535  | h  |
| -2.63522079623721 | 7.52458560893470  | 5.92873649729543  | h  |
| -1.56648087996730 | 5.00737833449440  | 8.00171306068944  | h  |
| 7.93181392819733  | -1.22321191209661 | -0.25322285273457 | h  |
| 8.45378462188717  | 2.18733678213098  | -0.26145817435388 | h  |
| 6.64992611803611  | 0.74677962432844  | -2.75740919081404 | h  |
| 6.06177566079510  | -0.86612847023861 | 4.03799520124877  | h  |
| 3.42685951481937  | 1.33492787700488  | 4.47582445372273  | h  |
| 6.59419498606680  | 2.52362758946265  | 3.96371832736983  | h  |
| -7.59510050209490 | -7.14300156412329 | 0.25968153302712  | h  |
| -5.45084155669186 | -9.16483353676470 | -1.37850941178549 | h  |
| -6.96589421791003 | -6.63072267454410 | -3.02974141968250 | h  |
| 7.72994528816232  | -6.20510264528954 | 2.02250122251049  | h  |
| 7.79327712512090  | -6.29320351664084 | -1.35993693871996 | h  |

# Supplementary Material (ESI) for Chemical Communications  
# This journal is (c) The Royal Society of Chemistry 2006

|                   |                   |                   |   |
|-------------------|-------------------|-------------------|---|
| 6.30493950841835  | -8.78832654441609 | 0.37863677112404  | h |
| 1.83895564212153  | -3.48557043204710 | -7.32639599991753 | h |
| 4.65996074927418  | -4.72728220544141 | -5.77601346641289 | h |
| 3.43901287583447  | -1.67518734541919 | -4.89251575890224 | h |
| -0.49521902735653 | -7.26022270743749 | -6.14884761469734 | h |
| -0.64583930651122 | -8.19793640764091 | -2.87211683478533 | h |
| 2.29808769851902  | -8.53211729105249 | -4.57269588444906 | h |
| -4.23271168759688 | -6.51556320600767 | 4.56510691333751  | h |
| -2.78527202754115 | -6.26680014936861 | 7.64921395049730  | h |
| -1.97719762682346 | -8.87059112684335 | 5.56941836299891  | h |
| 3.35618604907285  | -4.25785494109720 | 5.20662471218286  | h |
| 2.63683682200911  | -7.52746501235724 | 5.92422052715151  | h |
| 1.56730214344033  | -5.01432868968623 | 8.00166376475804  | h |
| -7.93266607598111 | 1.22301545414330  | -0.25247314844850 | h |
| -8.45332772334329 | -2.18805523325206 | -0.26140534277033 | h |
| -6.65052118049387 | -0.74708498723847 | -2.75688690526465 | h |
| -6.06146031802643 | 0.86492132125197  | 4.03934324172584  | h |
| -3.42615975547394 | -1.33631498739675 | 4.47557380426601  | h |
| -6.59271769557540 | -2.52524941265532 | 3.96365286074880  | h |
| -0.00027580724761 | 7.78053684366091  | 1.79855195279084  | h |
| 0.00031964582812  | -7.78009139430137 | 1.79604742966096  | h |
